# Supplementary material
Source: MDPI journal article supplement (https://www.mdpi.com/1099-4300/20/9/632)
Supplement: s1 [file s1]

# Package ‘rree’

August 14, 2018

**Type** Package

**Title** Robust Relative Error Estimation

**Version** 0.2

**Date** 2018-08-10

**Author** Kei Hirose

**Maintainer** Kei Hirose <mail@keihirose.com>

**Imports** Rcpp

**LinkingTo** Rcpp, RcppArmadillo

**Depends** MASS, GeneralizedHyperbolic

**Description** An R package ``rree'' robust estimation via negative gamma-likelihood.  
The MM algorithm is used.

**License** GPL (>= 2)

**URL** <http://www.keihirose.com>

**NeedsCompilation** yes

## R topics documented:

|                |   |
|----------------|---|
| rree           | 1 |
| rree.generator | 3 |

|              |          |
|--------------|----------|
| <b>Index</b> | <b>5</b> |
|--------------|----------|

---

|      |                                          |
|------|------------------------------------------|
| rree | <i>Robust Relative Error Estimation.</i> |
|------|------------------------------------------|

---

## Description

This function gives us the robust least product relative error (LPRE) estimator and robust least squares relative error (LSRE) estimator via gamma-likelihood from a "rree" object for fixed value of gamma.

## Usage

```
rree(x, y, intercept=TRUE, gam, beta.init, type="LPRE", algorithm="MM",  
      maxit=1000, cov.beta = TRUE, tol=sqrt(.Machine$double.eps))
```

**Arguments**

|           |                                                                                                                                                                                                                                                           |
|-----------|-----------------------------------------------------------------------------------------------------------------------------------------------------------------------------------------------------------------------------------------------------------|
| x         | Matrix of predictors.                                                                                                                                                                                                                                     |
| y         | Vector of responses.                                                                                                                                                                                                                                      |
| intercept | If TRUE, intercept is included.                                                                                                                                                                                                                           |
| gam       | The value of gamma used in the gamma-likelihood function. If gam=0, the ordinary relative error loss function is minimized (i.e., likelihood function is maximized).                                                                                      |
| beta.init | Initial value fo beta. If missing, it becomes zero vector.                                                                                                                                                                                                |
| type      | Either "LPRE" or "LSRE". Details are presented in our paper.                                                                                                                                                                                              |
| algorithm | "MM" "BFGS", or "hybrid". With the hybrid, first MM algorithm is conducted, and then BFGS is used. The hybrid is generally fast and stable. The BFGS is the fastest but sometimes unstable. The convergence of the MM is slow but MM is generally stable. |
| maxit     | Maximum number of iterations in the MM algorithm.                                                                                                                                                                                                         |
| cov.beta  | If TRUE and type="LPRE", the asymptotic covariance matrix of estimator is computed.                                                                                                                                                                       |
| tol       | Threshold used for convergence of parameter.                                                                                                                                                                                                              |

**Value**

|           |                                            |
|-----------|--------------------------------------------|
| beta      | Coefficient vector.                        |
| loss      | The value of loss criterion.               |
| cov.beta  | Asymptotic covariance matrix of estimator. |
| weight    | Weights in the weighted log-likelihood.    |
| intercept | If TRUE, intercept is included.            |
| x         | Matrix of predictors.                      |
| y         | Vector of responses.                       |

**Author(s)**

Kei Hirose  
<mail@keihirore.com>

**References**

Hirose, K. and Masuda, H. (2018). Robust relative error estimation. *manuscript*.

**See Also**

predict.rree and rree.generator objects.

**Examples**

```
#generate data
dat <- rree.generator(n=50, p=5, outlier.ratio=0.1) #about last 10% data values are outliers

#fitting
fit <- rree(dat$x, dat$y, gam=0) #ordinary LPRE
fit2 <- rree(dat$x, dat$y, gam=0.2) #robust LPRE with gamma=0.2
```

```

fit
fit2

#prediction
predict(fit2, newx=dat$x[1:10,])

```

rree.generator

*Generate Dataset.*

## Description

This function generates dataset with outliers. The target distribution is positive harmonic distribution or log normal distribution, and the contaminated distribution is log normal distribution.

## Usage

```
rree.generator (n = 100, p = 20, type="rgig", seed=0, beta.true, x.sigma, x,
               sd.lnorm=1, outlier.ratio=0.1, outlier.par=c(2.5,0.1))
```

## Arguments

|               |                                                                                                                                                                                 |
|---------------|---------------------------------------------------------------------------------------------------------------------------------------------------------------------------------|
| n             | The number of observations.                                                                                                                                                     |
| p             | The number of variables.                                                                                                                                                        |
| type          | Either "rgig" or "lnorm". "rgig" corresponds to the positive harmonic distribution, which is a density function for LPRE loss function. "lnorm" is the log-normal distribution. |
| seed          | Seed for generating the random number.                                                                                                                                          |
| beta.true     | True value fo beta. If missing, beta.true = rep(1/(p + 1), p + 1).                                                                                                              |
| x.sigma       | Covariance matrix of design matrix. If missing, the covariance structure is AR(1) with AR parameter 0.7.                                                                        |
| x             | Design matrix. If missing, x = mvrnorm(n, mu = rep(0, p), Sigma = x.sigma).                                                                                                     |
| sd.lnorm      | Only used when target = "lnorm". Standard deviation of log normal distribution for target distribution (sdlog in rlnorm).                                                       |
| outlier.ratio | Outlier ratio.                                                                                                                                                                  |
| outlier.par   | Parameter vector for log-normal distribution for contamination of meanlog and sdlog in rlnorm.                                                                                  |

## Value

|         |                                                                  |
|---------|------------------------------------------------------------------|
| x       | Matrix of predictors.                                            |
| y       | Vector of responses.                                             |
| beta    | coefficient vector.                                              |
| x.sigma | Covariance matrix of design matrix.                              |
| n.true  | The number of observations drawn from target distribution.       |
| n.cont  | The number of observations drawn from contaminated distribution. |

**Author(s)**

Kei Hirose  
<mail@keihirore.com>

**References**

Hirose, K. and Masuda, H. (2018). Robust relative error estimation. *manuscript*.

**See Also**

rree object.

**Examples**

```
#generate data  
dat <- rree.generator(n=50, p=5, outlier.ratio=0.1) #about last 10% data values are outliers
```

# Index

`predict.rree(rree)`, [1](#)

`rree`, [1](#)

`rree.generator`, [3](#)
